# Supplementary material for: Genetic Diversity, Nitrogen Fixation, and Water Use Efficiency in a Panel of Honduran Common Bean (Phaseolus vulgaris L.) Landraces and Modern Genotypes
Source: MDPI journal article supplement (doi:10.3390/plants9091238), 2020-09-19
Supplement: s1 [file s1]

A

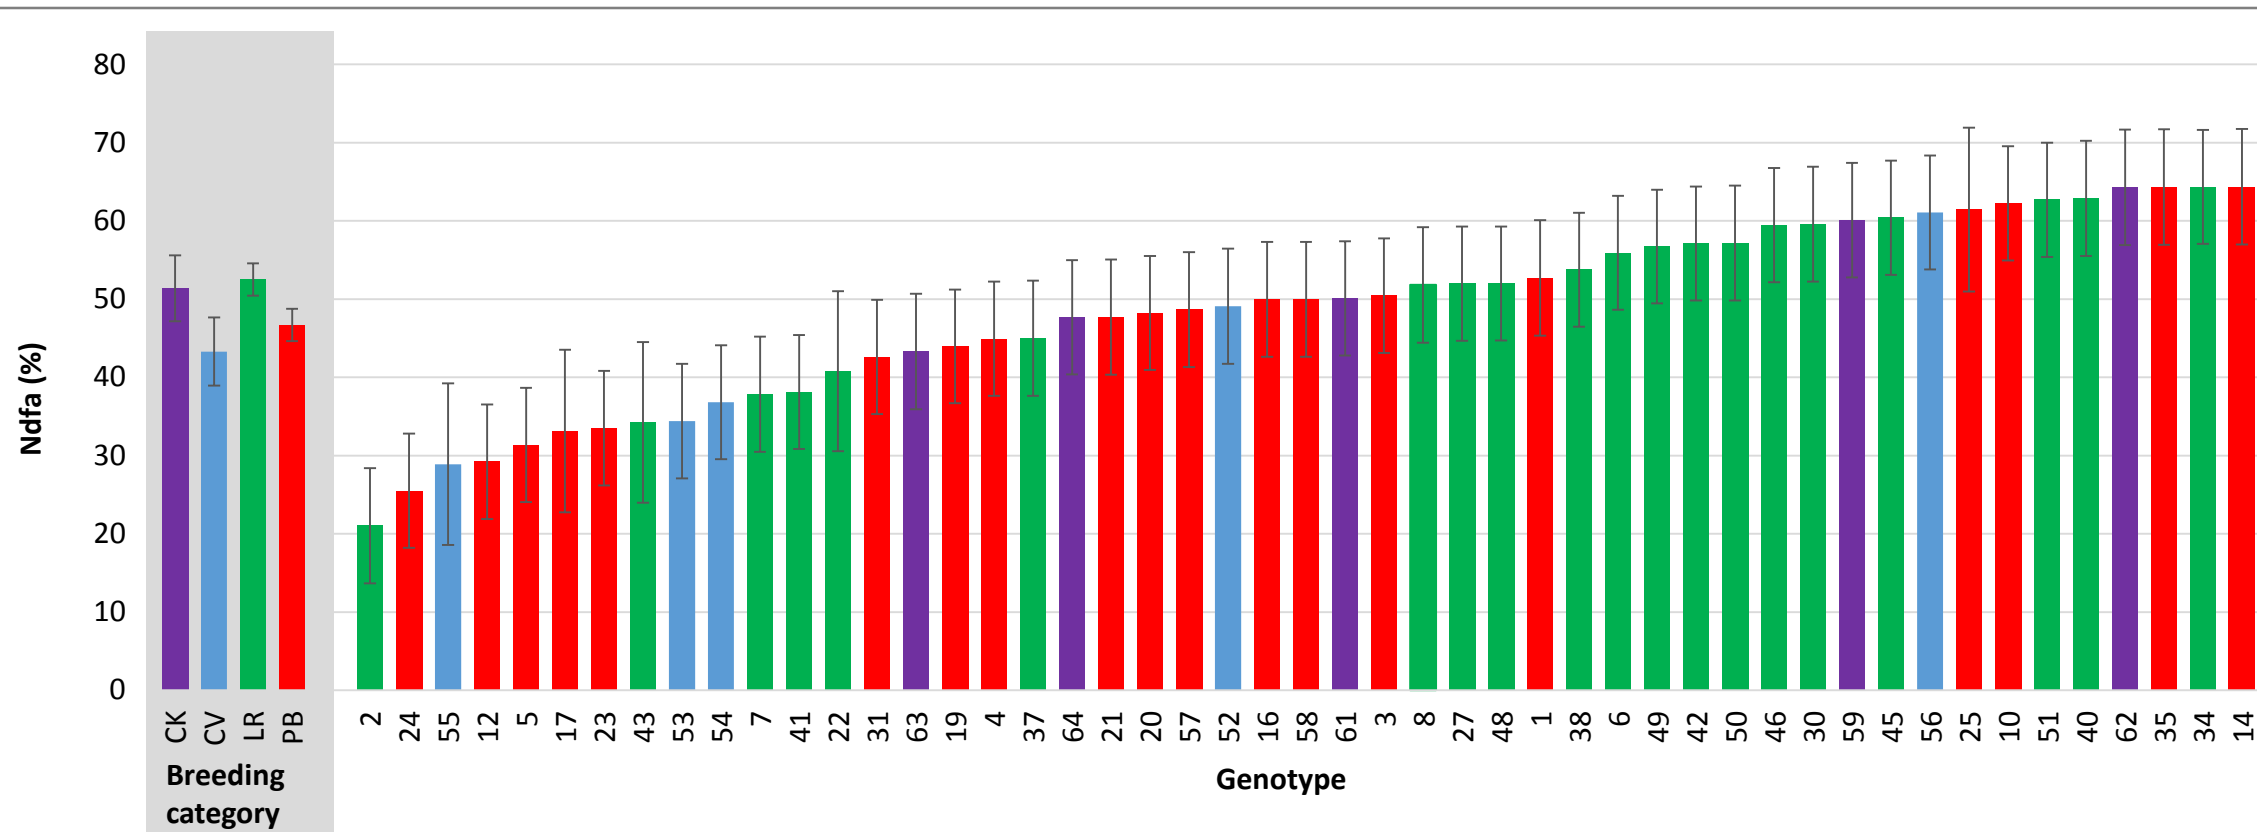

B

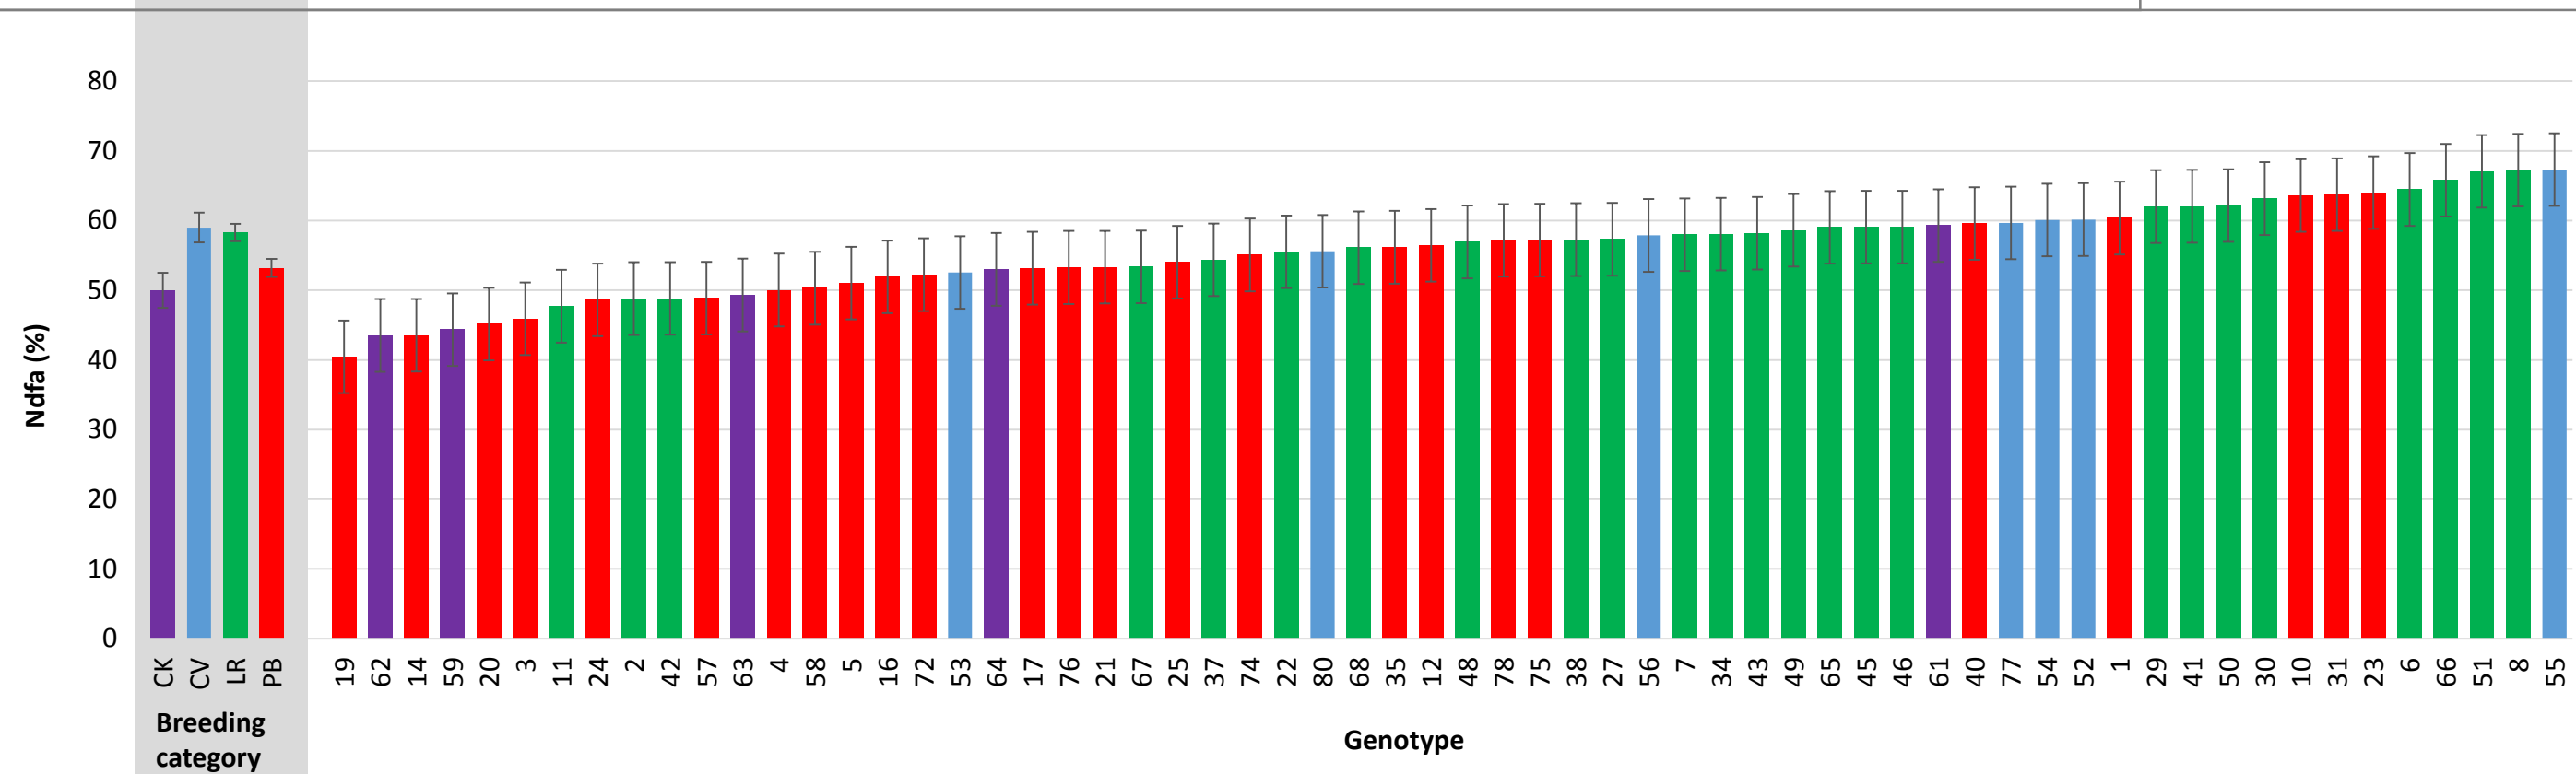

C

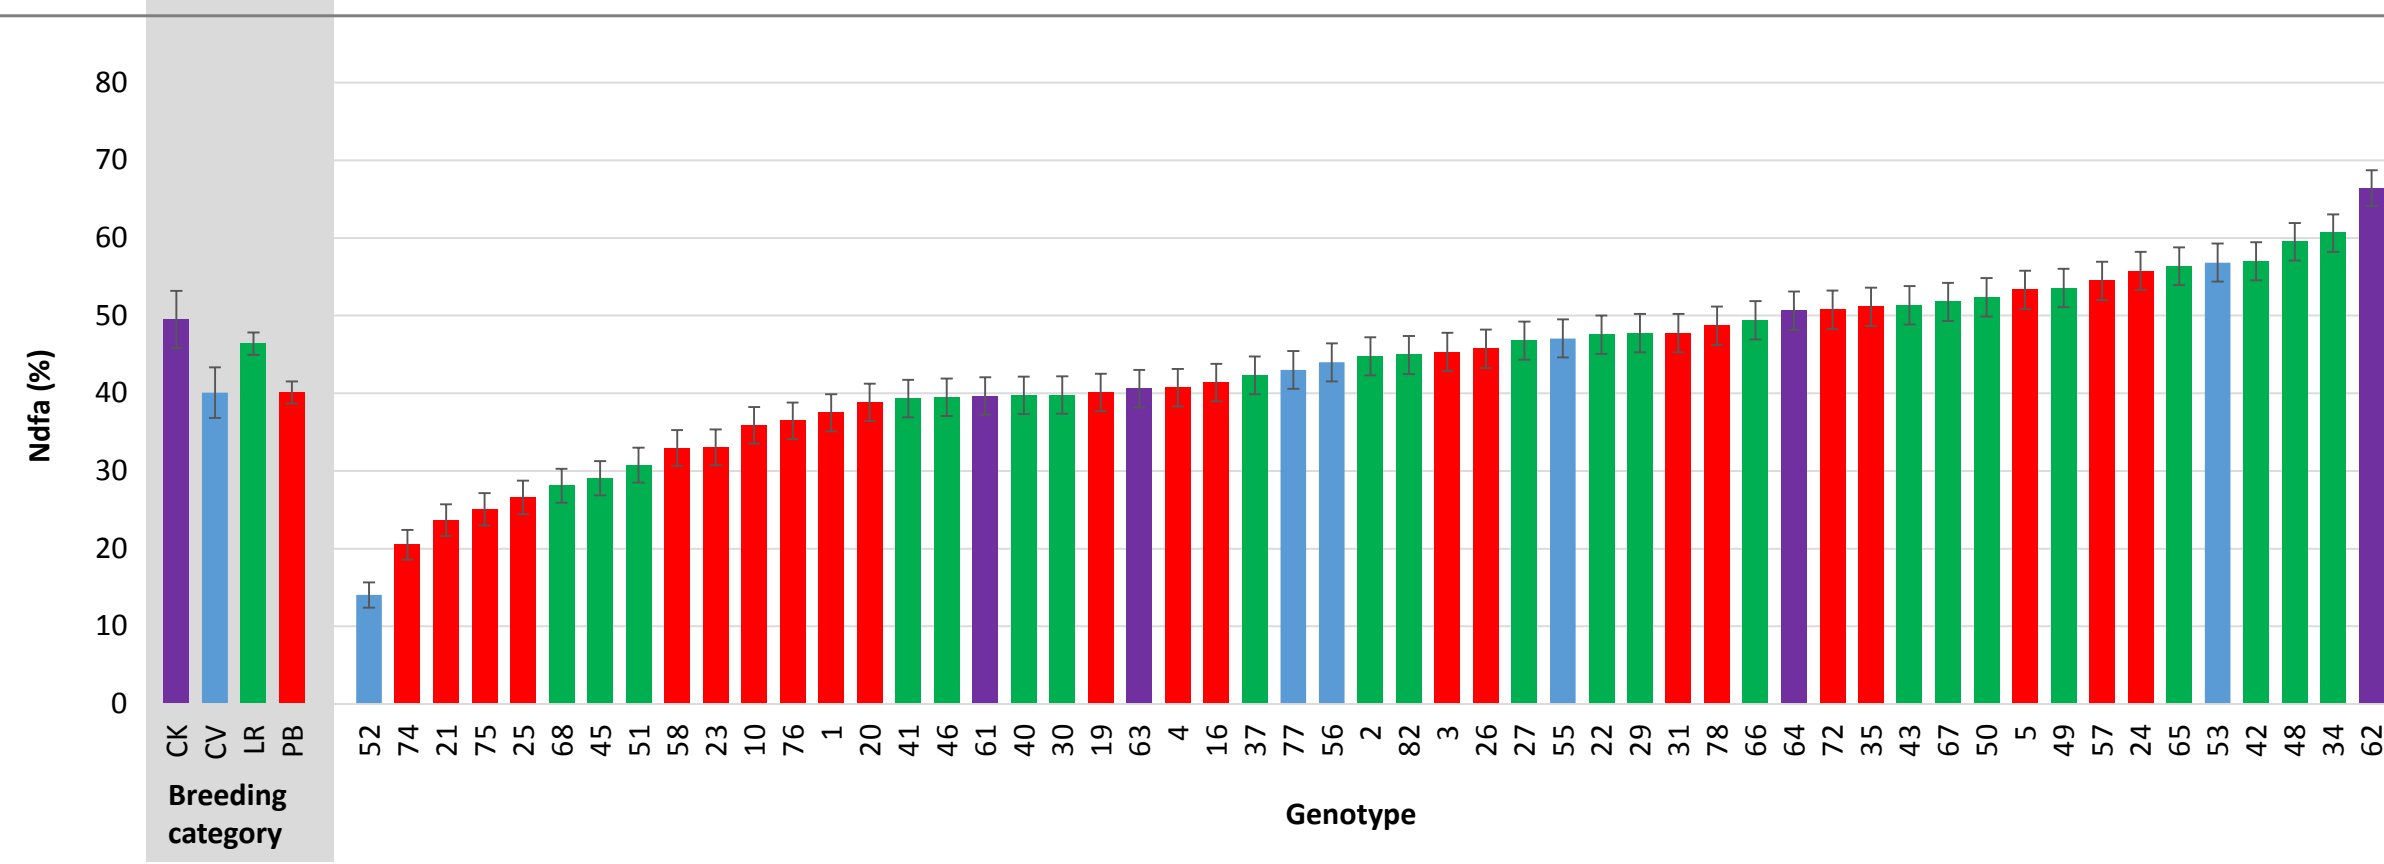

**Figure S1.** Histograms of Nitrogen derived from the atmosphere (%) values of genotypes comprising the HON panel tested at three field locations from 2014-2015. **A.** Elora 2014, **B.** Elora 2015 and **C.** Yorito. Breeding history category averages with standard errors are presented, followed by individual genotype LSmeans with standard errors. North American check genotypes (CK; purple), Honduran conventional genotypes (CV; blue), landraces (LR; green), and PPB varieties (PB; red). Genotype numbers correspond to those listed in Tables 6-8.

A

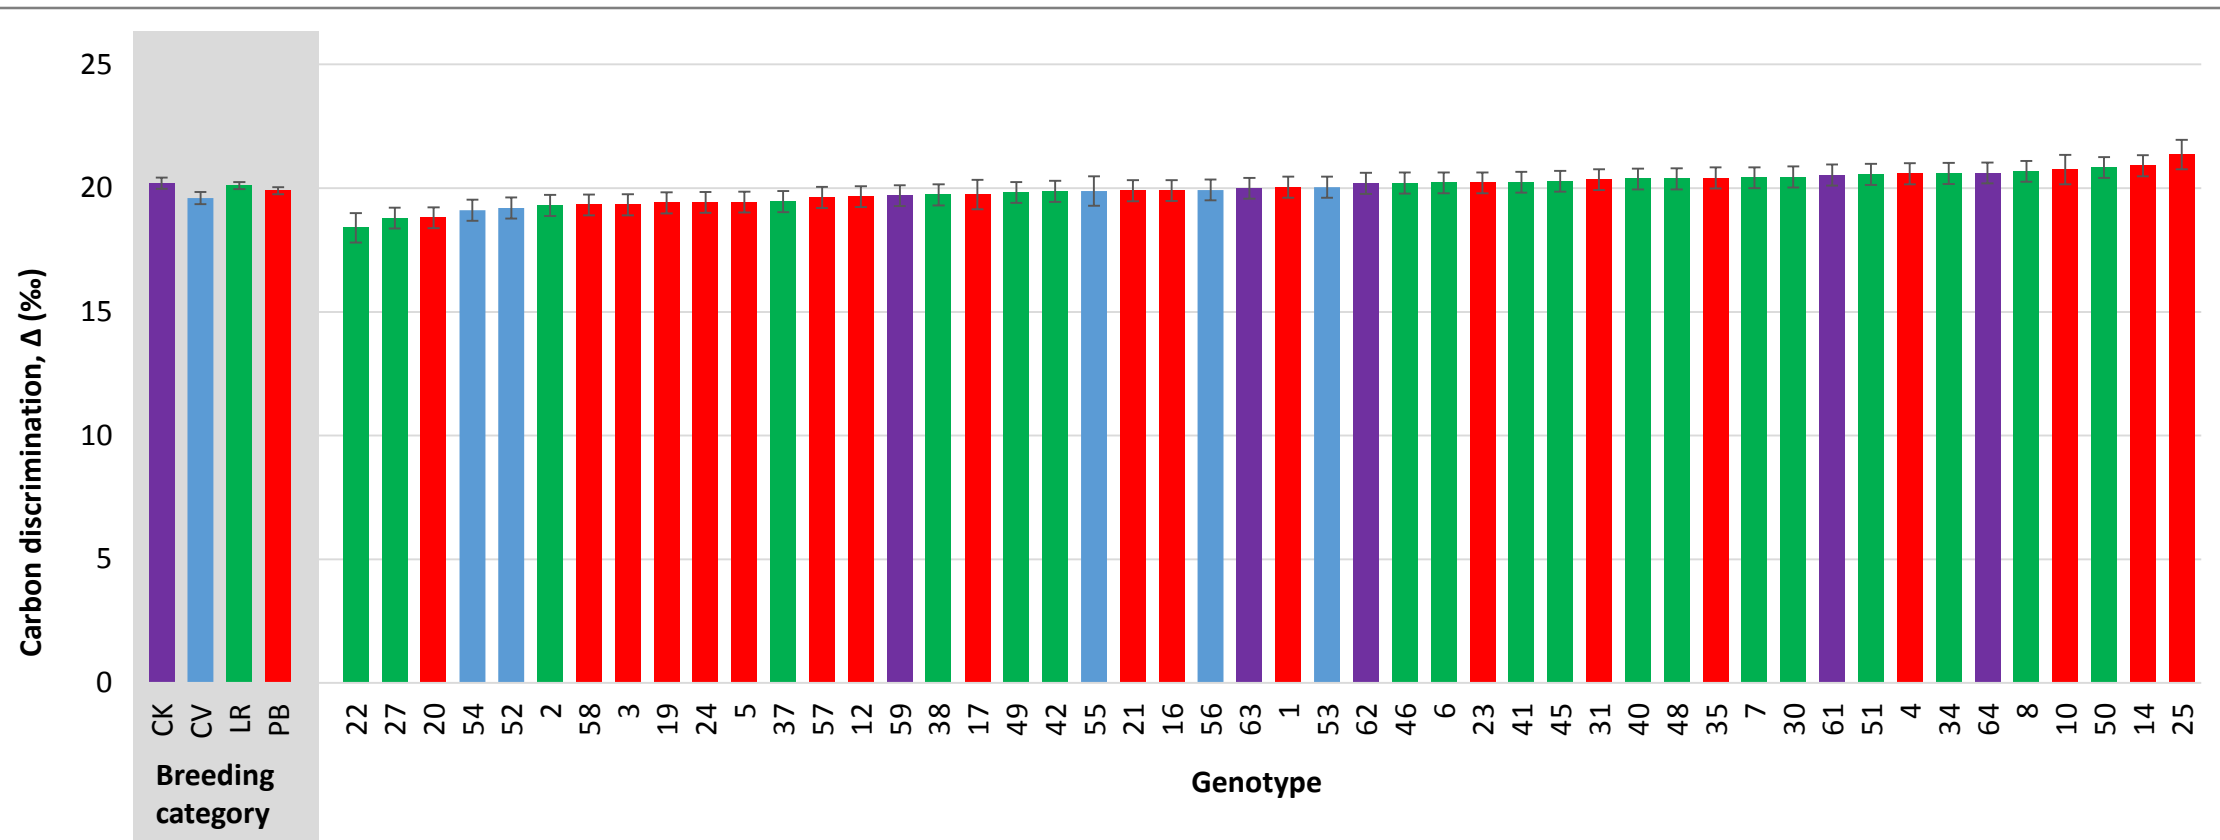

B

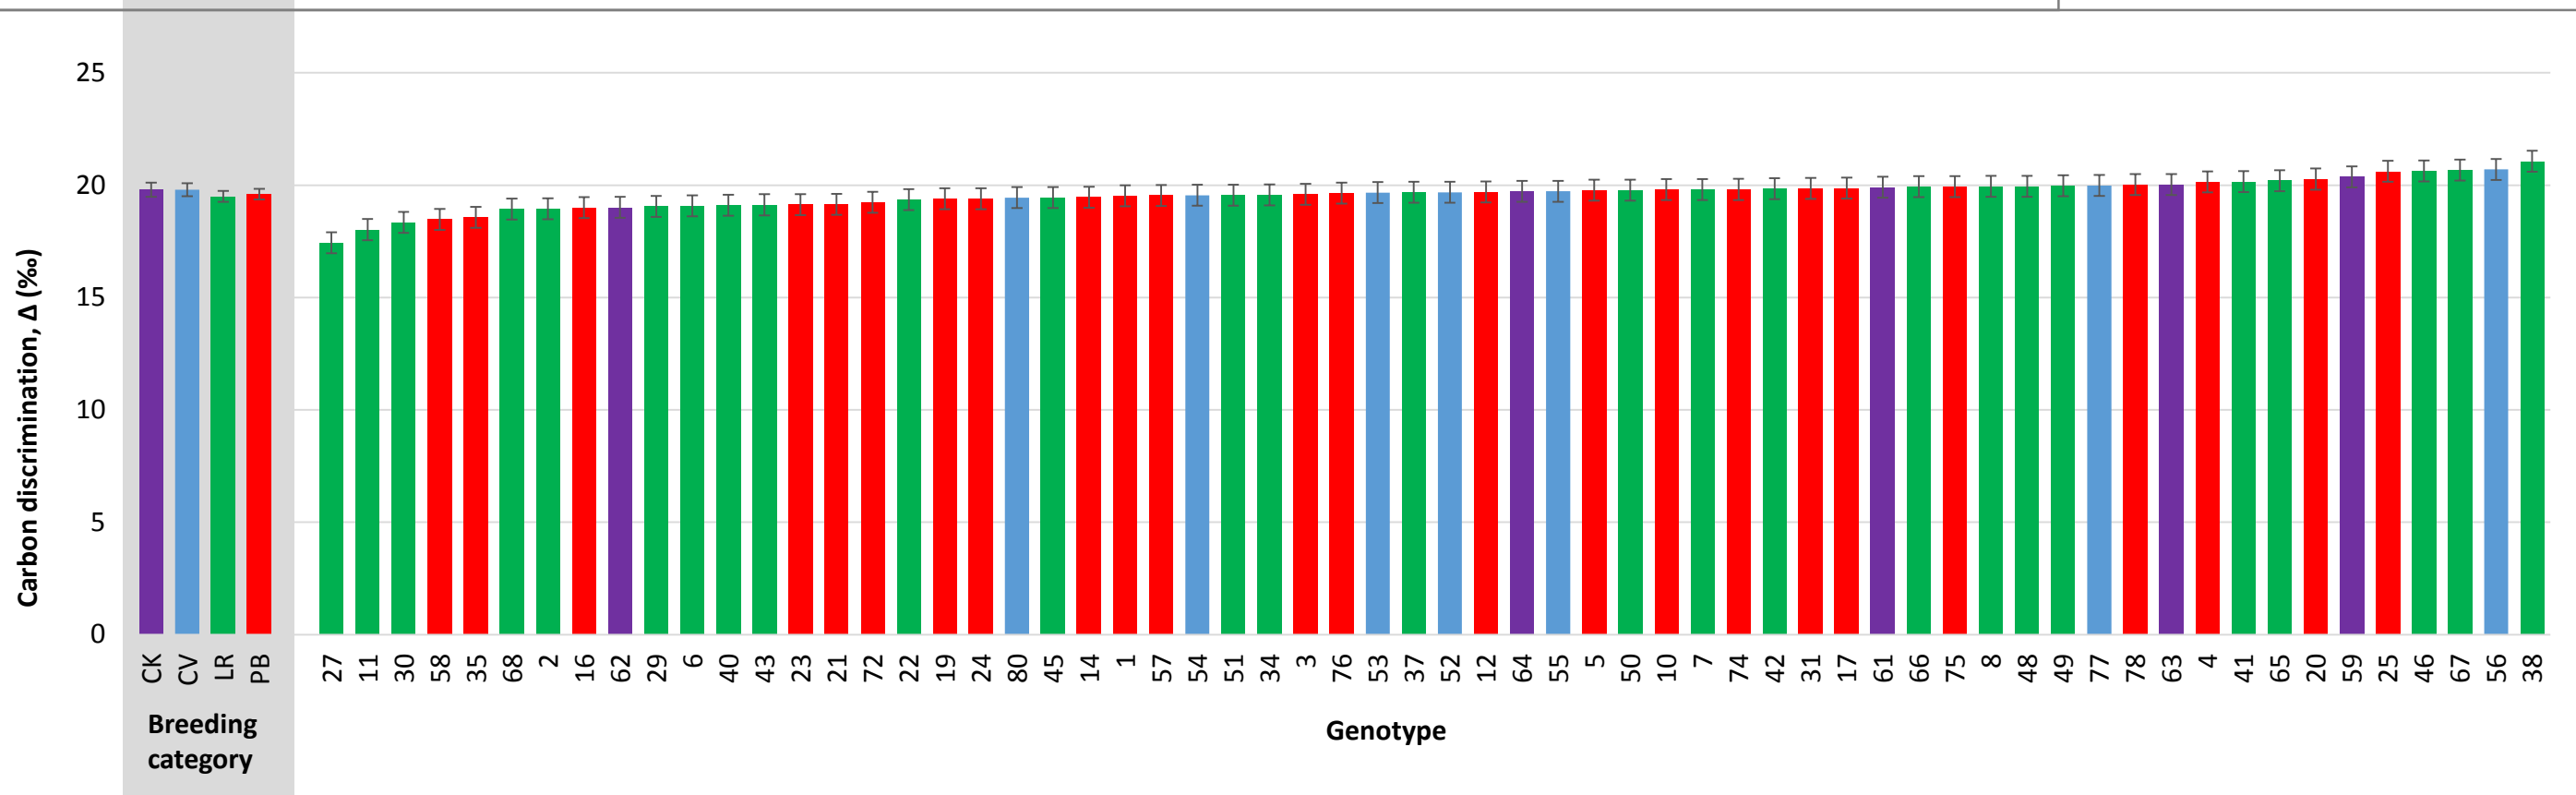

C

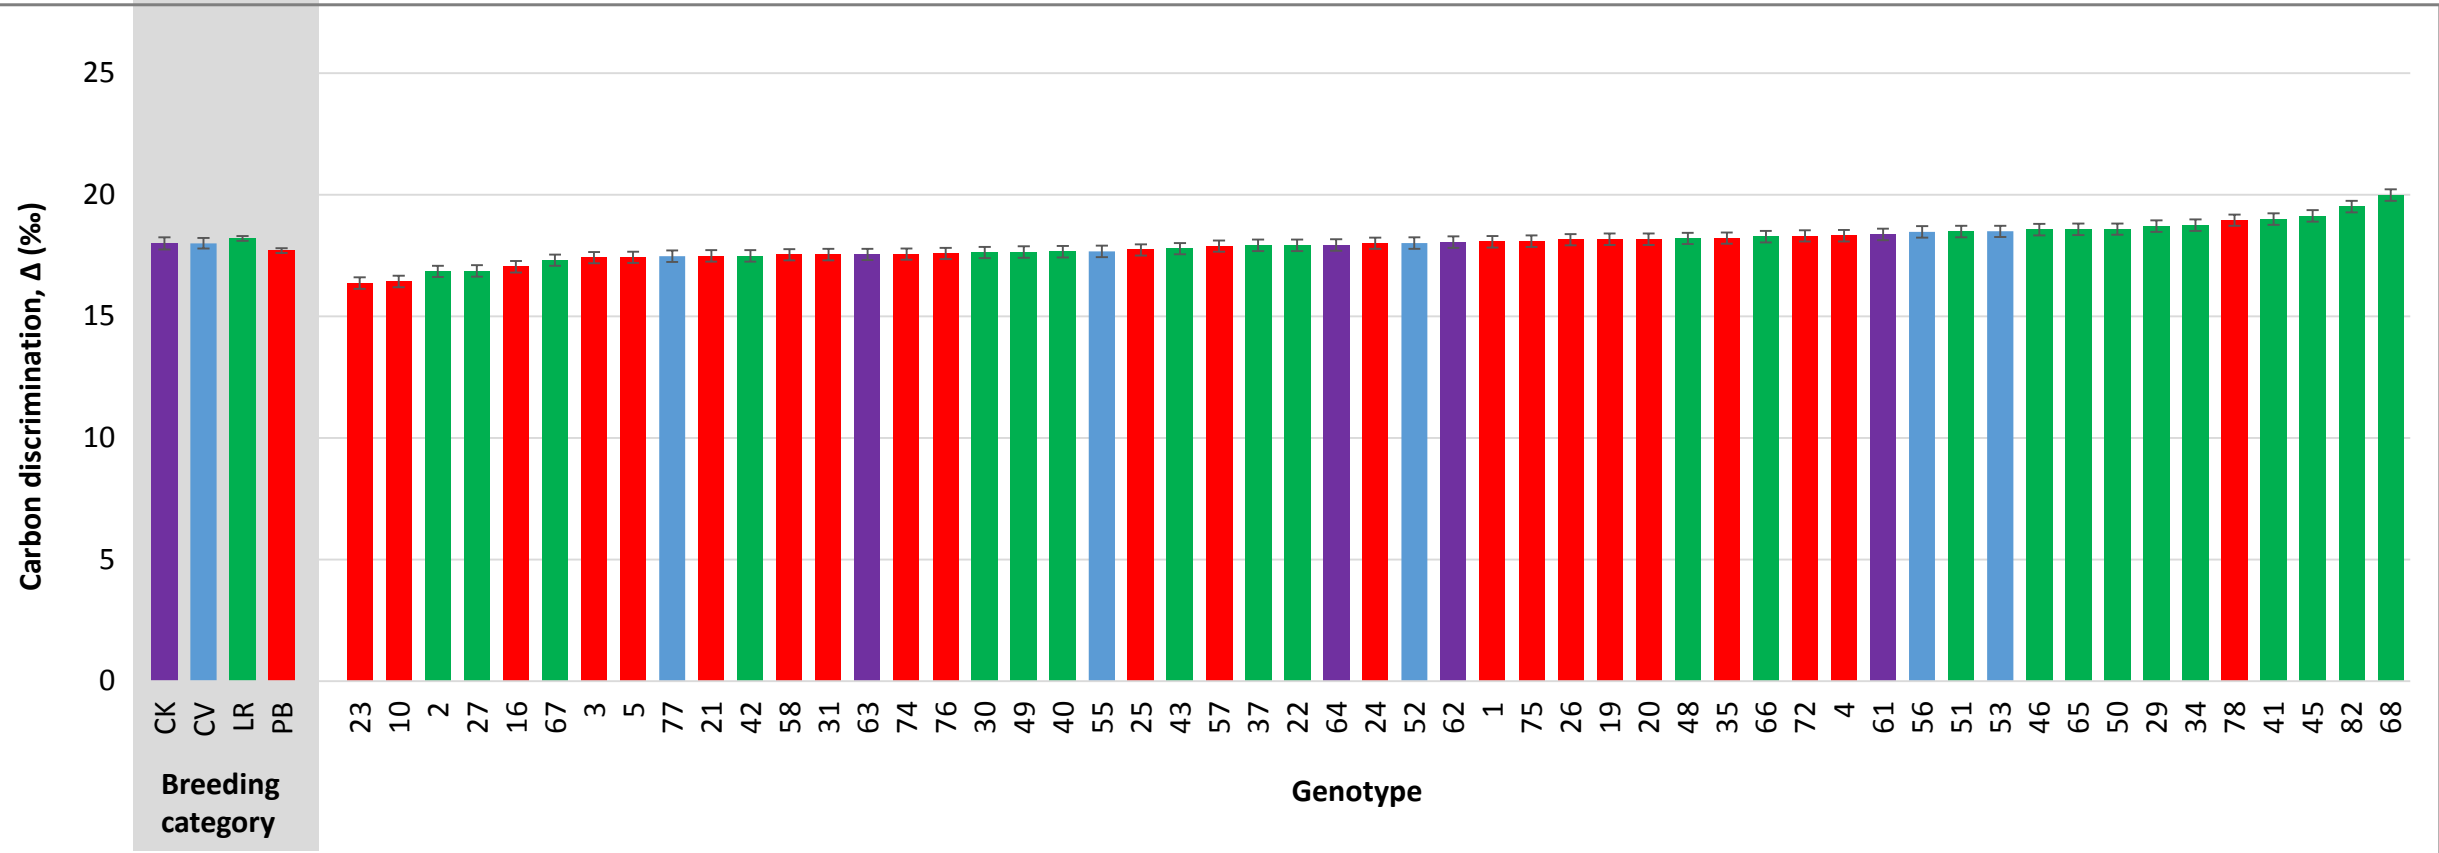

**Figure S2.** Histograms of carbon discrimination ( $\Delta$ ) values of genotypes comprising the HON panel tested at three field locations from 2014-2015. **A.** Elora 2014, **B.** Elora 2015 and **C.** Yorito. Breeding history category averages with standard errors are presented, followed by individual genotype LSmeans with standard errors. North American check genotypes (CK; purple), Honduran conventional genotypes (CV; blue), landraces (LR; green), and PPB varieties (PB; red). Genotype numbers correspond to those listed in Tables 6-8.

**A**

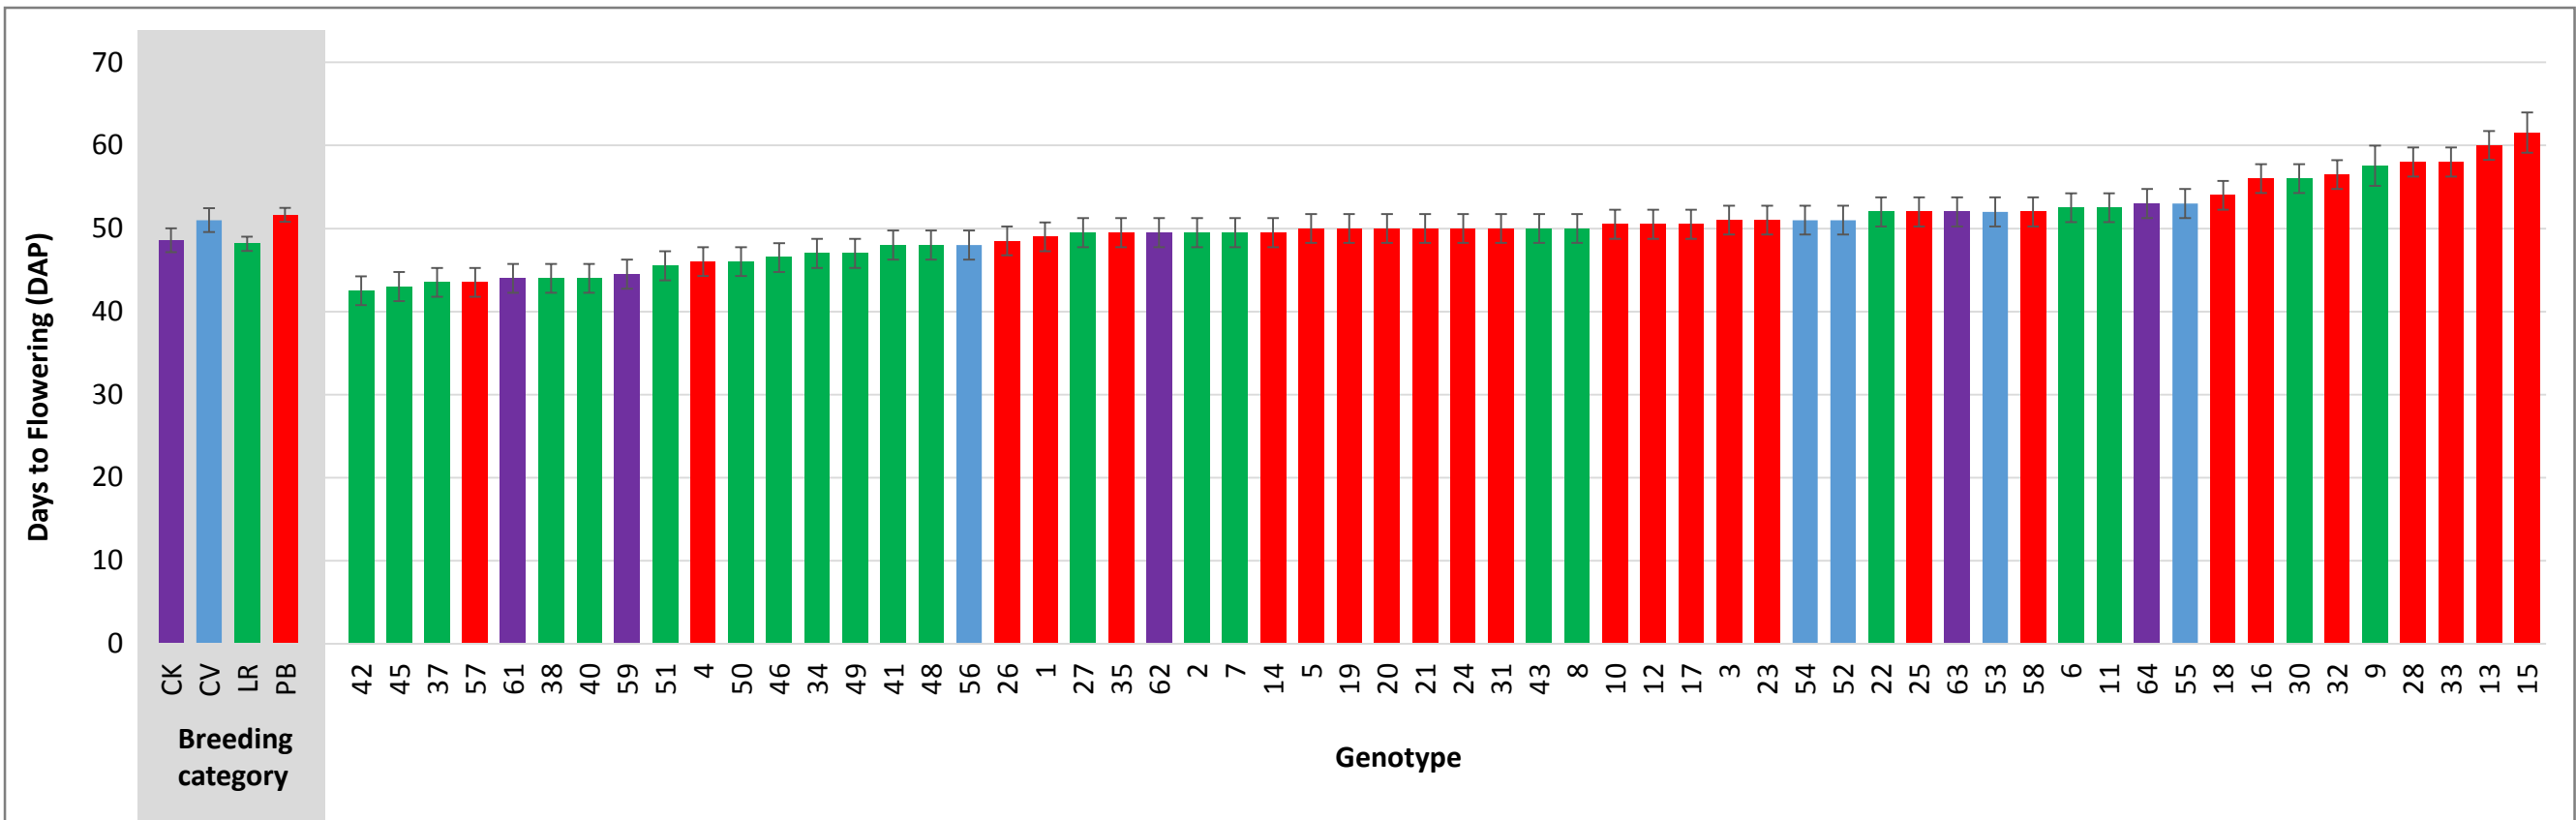

**B**

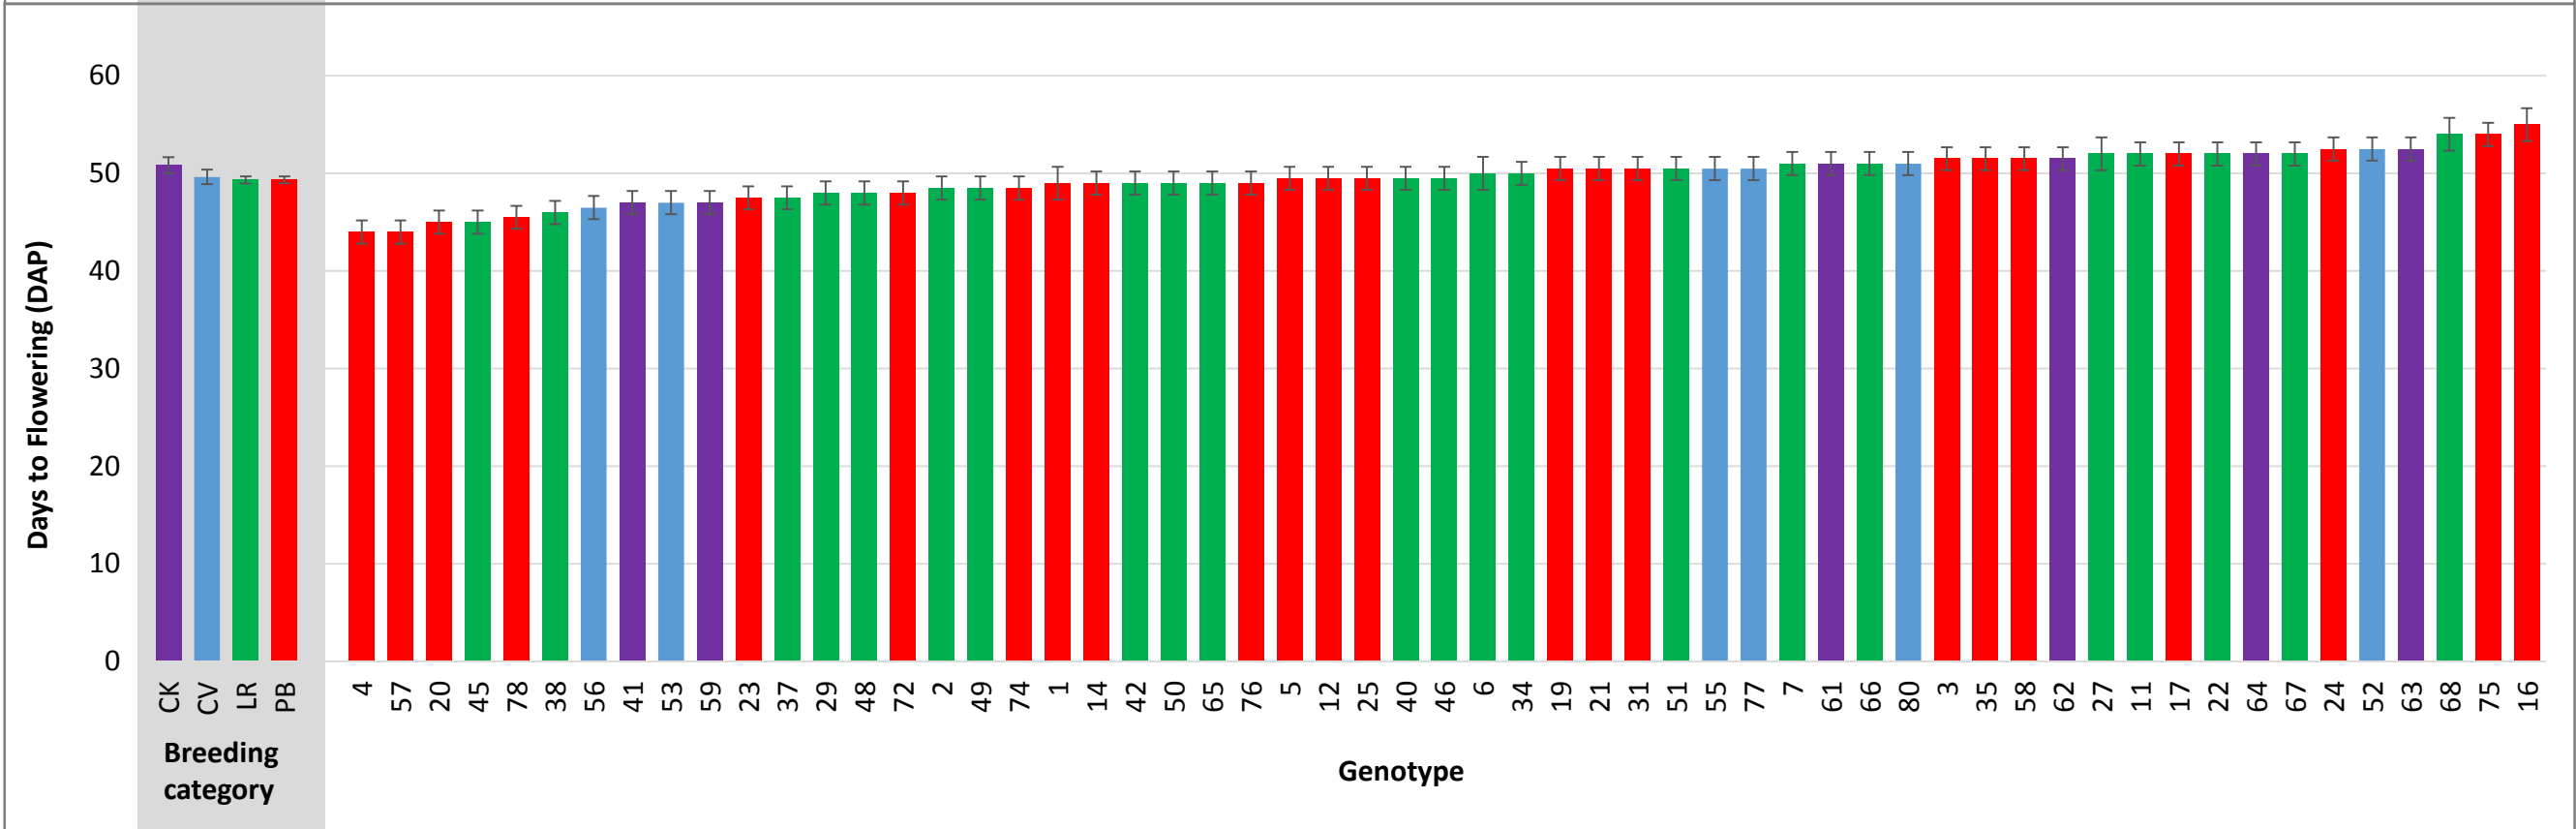

**Figure S3.** Histograms of days to flowering of genotypes comprising the HON panel tested at two field locations from 2014-2015. **A.** Elora 2014, **B.** Elora 2015. Breeding history category averages with standard errors are presented, followed by individual genotype LSmeans with standard errors. North American check genotypes (CK; purple), Honduran conventional genotypes (CV; blue), landraces (LR; green), and PPB varieties (PB; red). Genotype numbers correspond to those listed in Tables 6-8.

**A**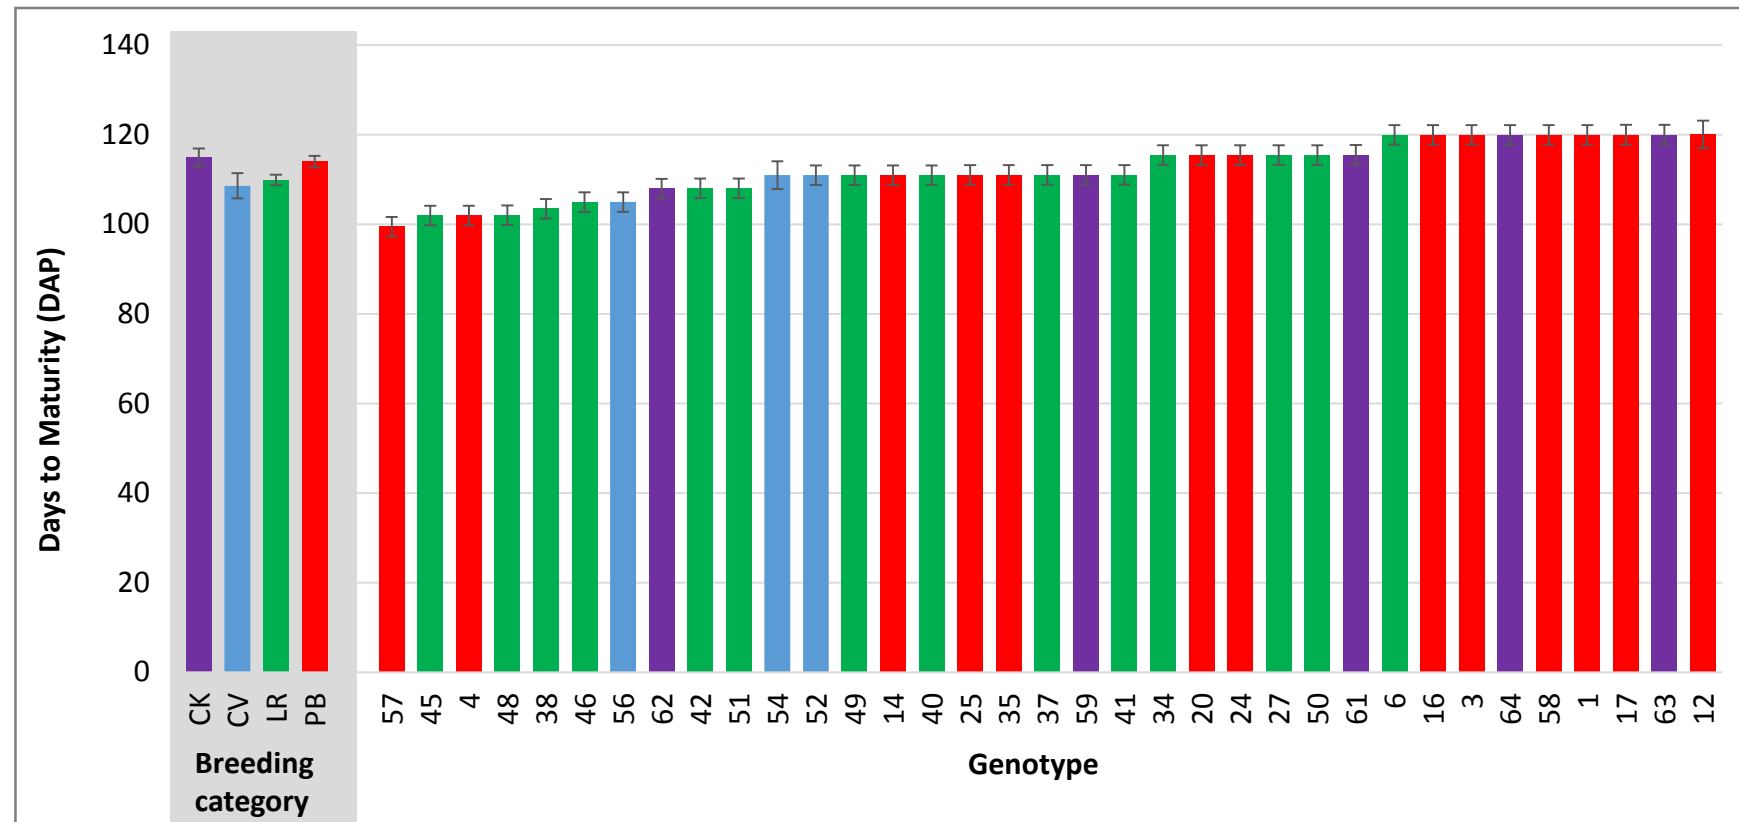**B**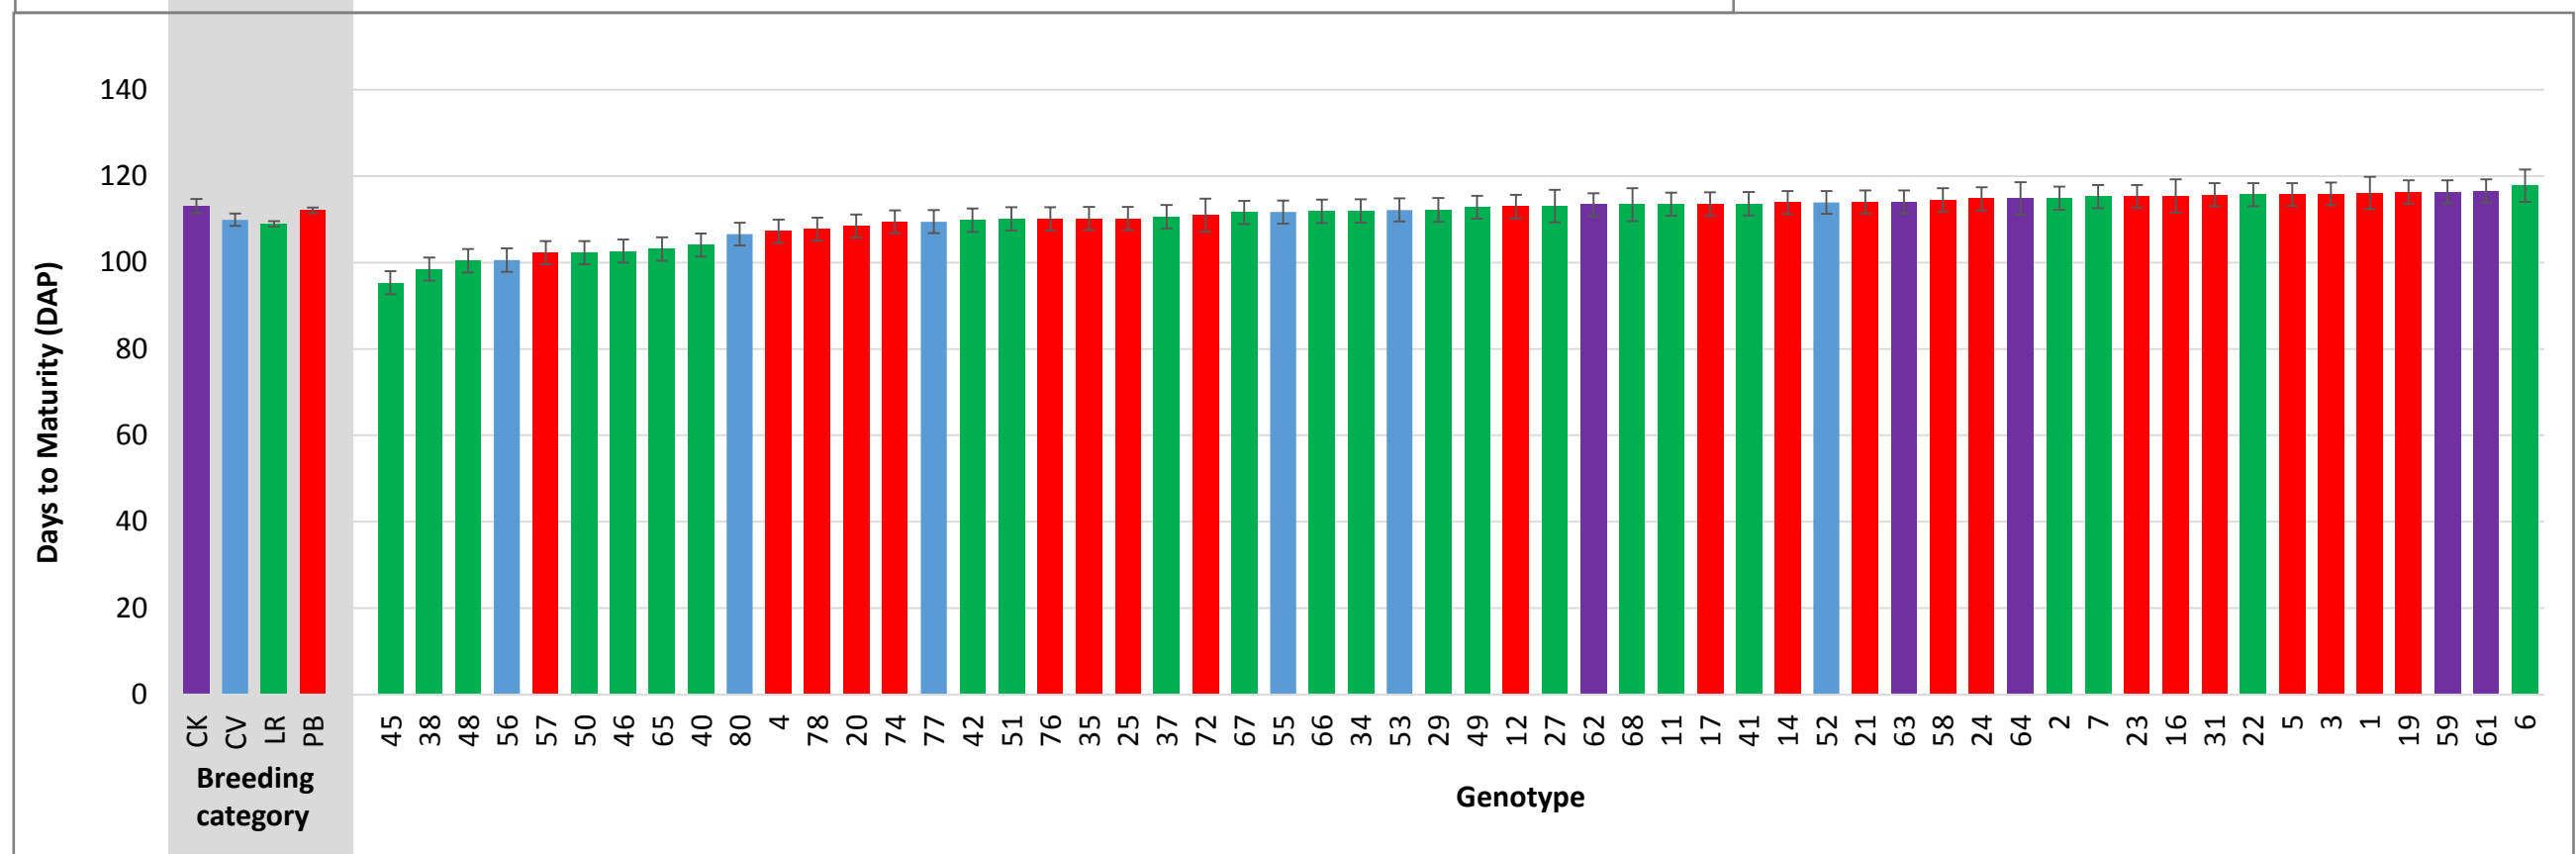

**Figure S4.** Histograms of days to maturity of genotypes comprising the HON panel tested at two field locations from 2014-2015. **A.** Elora 2014, **B.** Elora 2015. Breeding history category averages with standard errors are presented, followed by individual genotype LSmeans with standard errors. North American check genotypes (CK; purple), Honduran conventional genotypes (CV; blue), landraces (LR; green), and PPB varieties (PB; red). Genotype numbers correspond to those listed in Tables 6-8.



**A**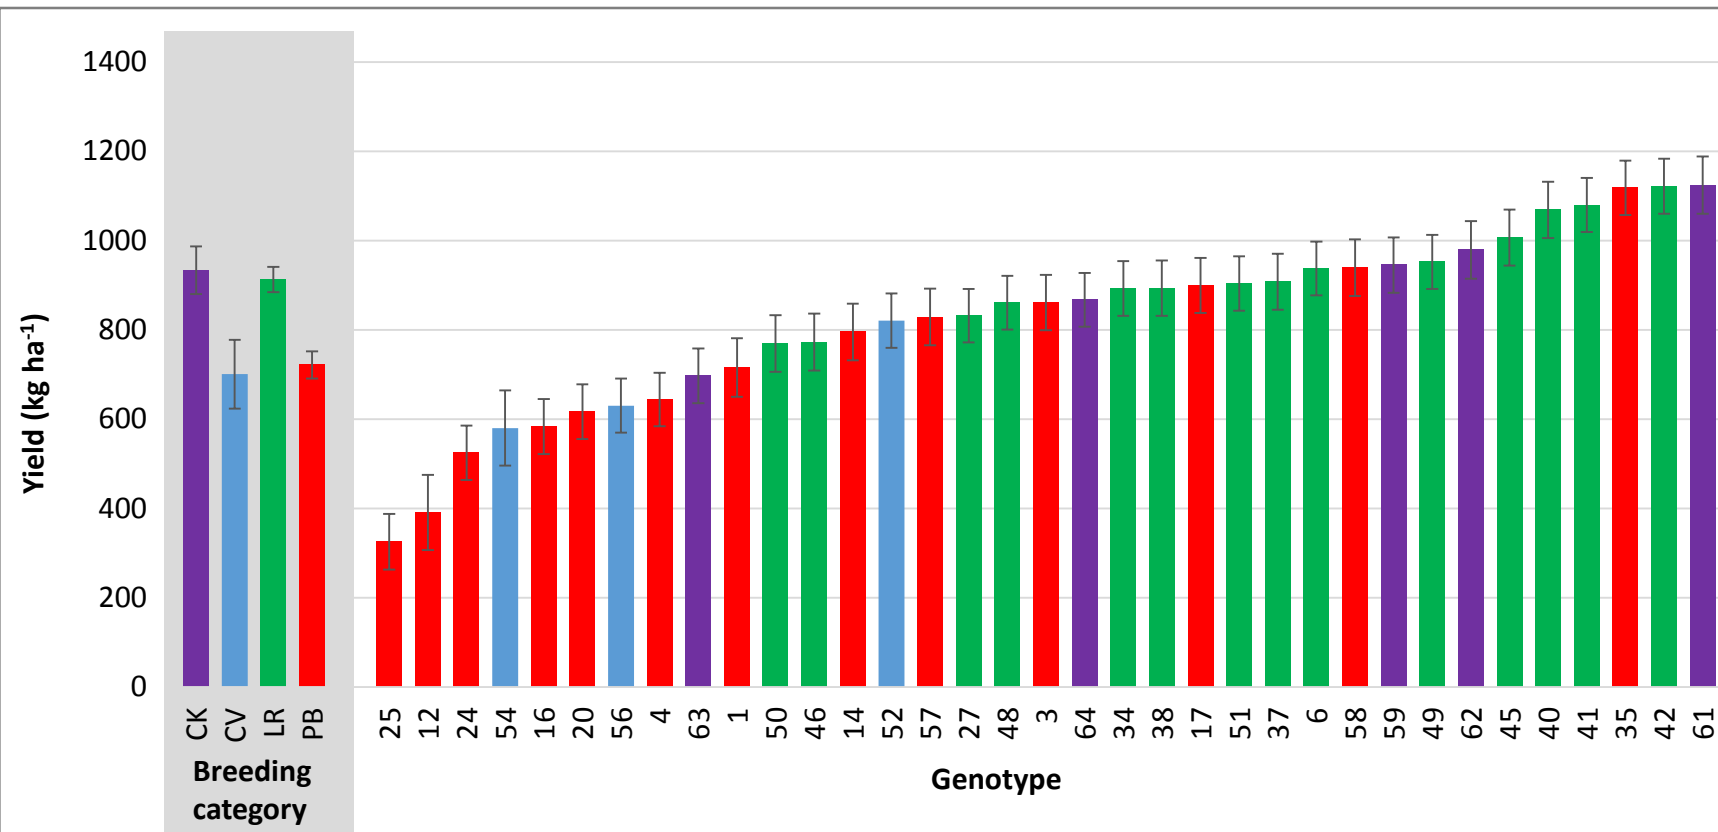**B**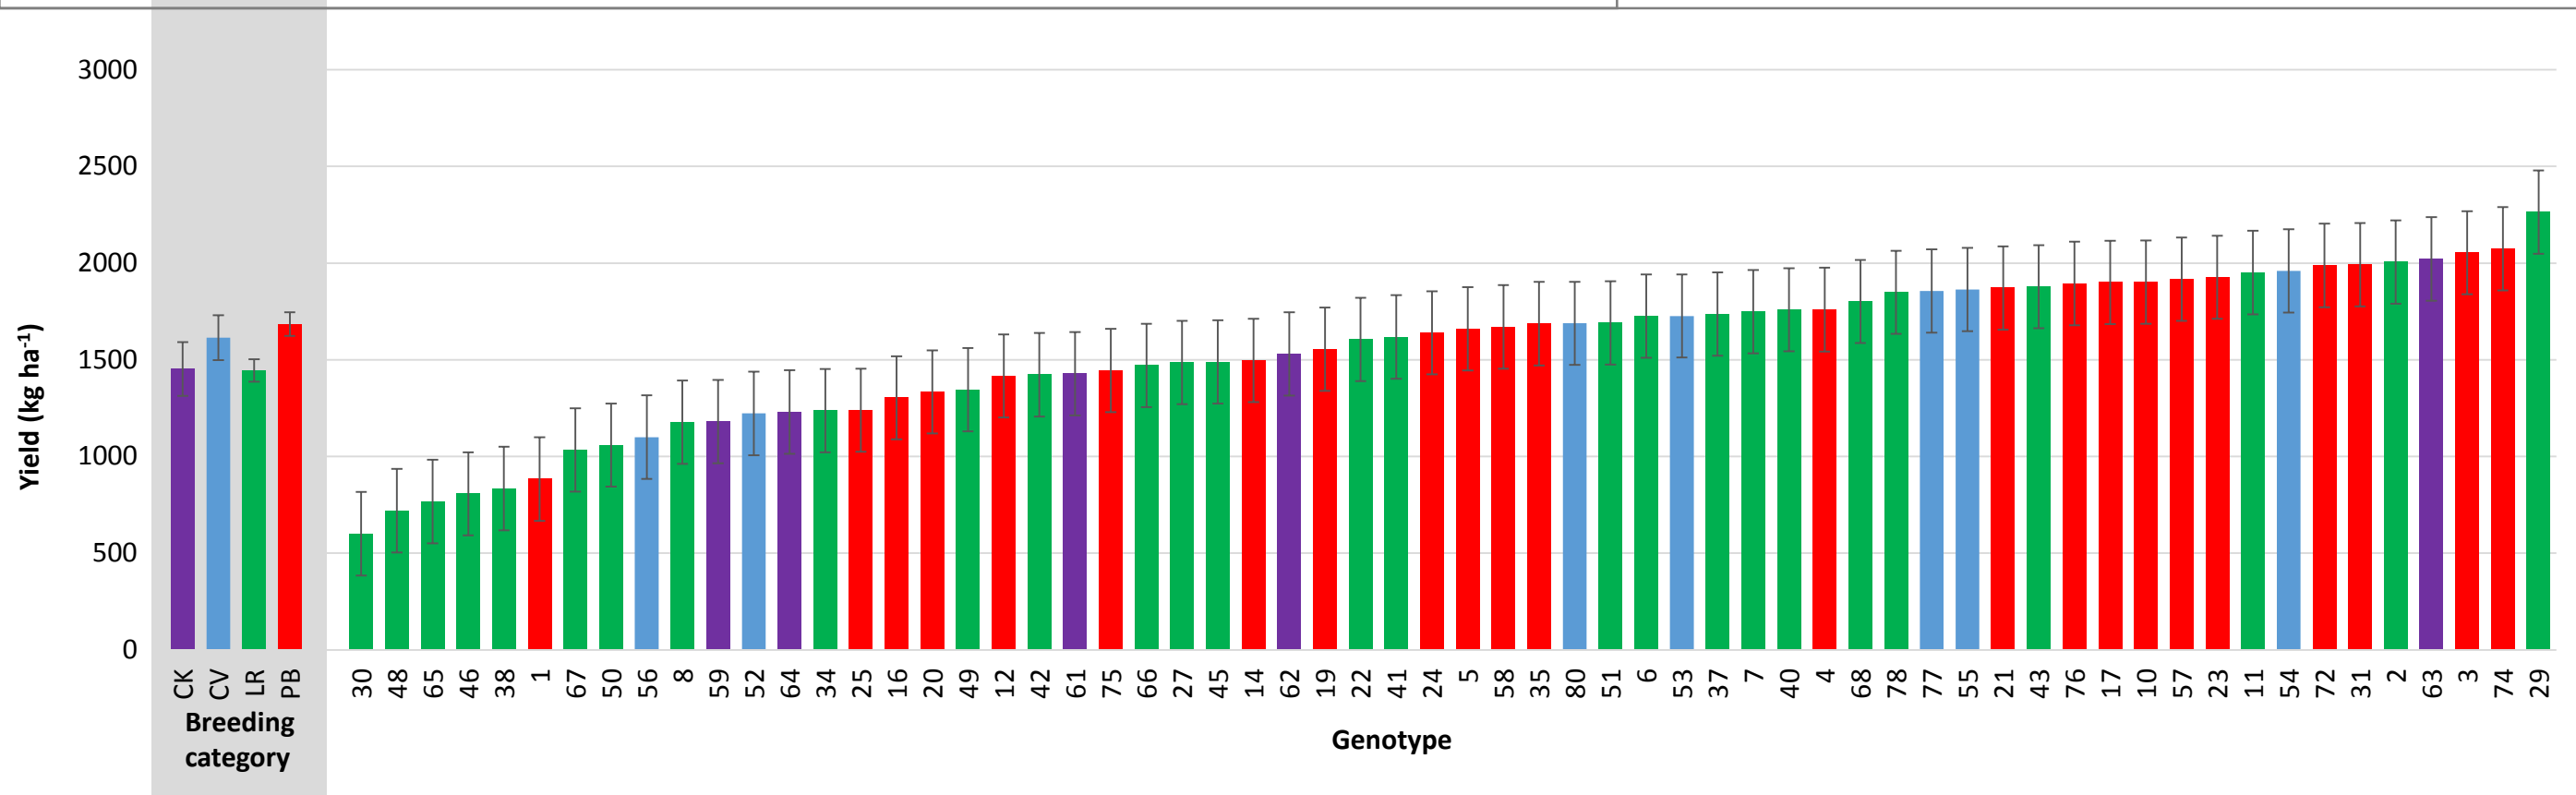**C**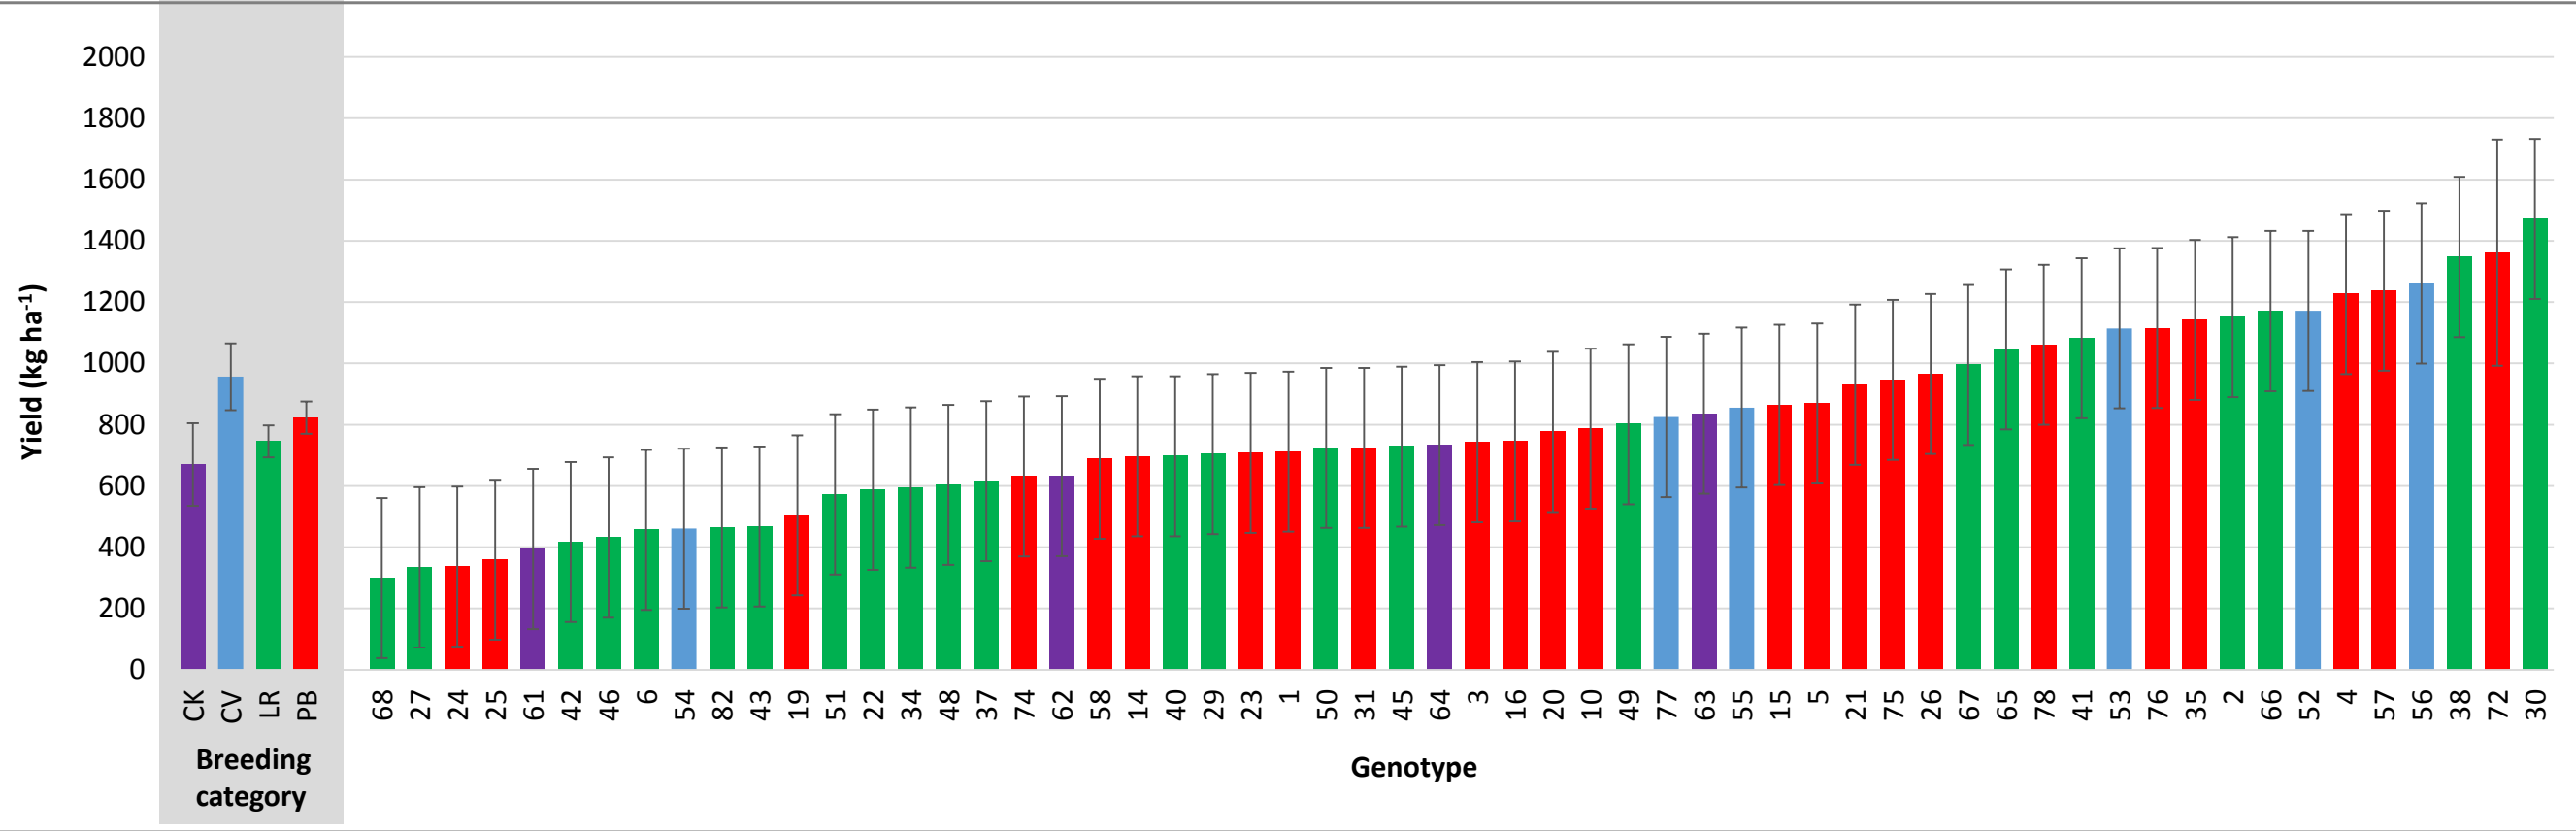

**Figure S5.** Histograms of yield (kg ha<sup>-1</sup>) values of genotypes comprising the HON panel tested at three field locations from 2014-2015. **A.** Elora 2014, **B.** Elora 2015 and **C.** Yorito. Breeding history category averages with standard errors are presented, followed by individual genotype LSmeans with standard errors. North American check genotypes (CK; purple), Honduran conventional genotypes (CV; blue), landraces (LR; green), and PPB varieties (PB; red). Genotype numbers correspond to those listed in Tables 6-8.
